# Supplementary material for: Performance Comparison of a Neuro-Symbolic Large Language Model System Versus Conventional AI Models and Human Experts in Cholangitis Management
Source: Research Square preprint supplement (doi:10.21203/rs.3.rs-8714103/v1), 2026-02-16
Supplement: Supplementary file 1 [file 09e20f194292fc3417cd4105.xlsx]

## Sheet: Questions_Complete
Q.No	Category	TG18 Severity	Etiology	Question	Option A	Option B	Option C	Option D	Option E	Correct Answer
1	Diagnosis	Grade I	Choledocholithiasis	A 58-year-old woman presents with right upper quadrant pain and fever (38.5°C) for 24 hours. Laboratory findings: WBC 12,500/μL, total bilirubin 3.2 mg/dL, ALP 280 U/L (normal <120). Ultrasound shows dilated common bile duct (10mm) with a 6mm stone. Vital signs are stable. According to Tokyo Guidelines 2018, what is the most appropriate diagnosis?	A) Suspected acute cholangitis	B) Definite acute cholangitis	C) Acute cholecystitis	D) Biliary colic	E) Choledocholithiasis without cholangitis	B
2	Diagnosis	Grade II	Choledocholithiasis	A 78-year-old man presents with Charcot's triad. Labs: WBC 15,000/μL, bilirubin 6.5 mg/dL, creatinine 1.1 mg/dL. Temperature 39.5°C. BP 125/80 mmHg. MRCP confirms CBD stone. According to TG18 severity grading, which grade best describes this patient?	A) Grade I (Mild)	B) Grade II (Moderate)	C) Grade III (Severe)	D) Cannot be determined	E) Not acute cholangitis	B
3	Diagnosis	Grade III	Choledocholithiasis	A 65-year-old woman with choledocholithiasis presents with fever, jaundice, and confusion. BP 85/50 mmHg requiring norepinephrine. Labs: WBC 22,000/μL, bilirubin 8.2 mg/dL, creatinine 2.8 mg/dL, lactate 4.5 mmol/L. According to TG18, what severity grade applies?	A) Grade I - organ function preserved	B) Grade II - risk factors present	C) Grade III - cardiovascular dysfunction	D) Grade III - renal dysfunction	E) Both C and D apply	E
4	Diagnosis	Grade I	Malignant Biliary Obstruction	A 70-year-old man with known pancreatic head mass presents with progressive jaundice over 2 weeks. He develops fever (38.2°C) and mild RUQ discomfort. Labs: WBC 11,000/μL, bilirubin 12 mg/dL, ALP 450 U/L. CT shows dilated biliary tree with pancreatic mass. What is the TG18 diagnostic classification?	A) Definite acute cholangitis	B) Suspected acute cholangitis	C) Obstructive jaundice without cholangitis	D) Biliary sepsis	E) Cannot determine without ERCP	A
5	Diagnosis	Grade II	Malignant Biliary Obstruction	A 68-year-old woman with cholangiocarcinoma and biliary stent placed 3 months ago presents with fever 39.2°C, rigors, and jaundice. WBC 4,500/μL, bilirubin 9.8 mg/dL, albumin 2.4 g/dL. BP stable. Which TG18 Grade II risk factors are present?	A) WBC <4,000 and hypoalbuminemia	B) High fever and hypoalbuminemia	C) Age ≥75 and high bilirubin	D) A and B	E) B only	D
6	Diagnosis	Grade II	Post-procedural/Iatrogenic	A 55-year-old man develops fever and RUQ pain 48 hours after ERCP with biliary stent placement. Temperature 38.8°C, WBC 14,000/μL, bilirubin 4.5 mg/dL (pre-ERCP was 8.0 mg/dL). Vital signs stable. According to TG18, this presentation is most consistent with:	A) Post-ERCP pancreatitis	B) Post-ERCP cholangitis - Grade I	C) Post-ERCP cholangitis - Grade II	D) Stent occlusion without infection	E) Normal post-procedural course	C
7	Diagnosis	Grade III	Post-procedural/Iatrogenic	A 62-year-old woman develops septic shock 24 hours after percutaneous transhepatic biliary drainage (PTBD). BP 70/40 mmHg on vasopressors, obtunded, WBC 28,000/μL, platelets 65,000/μL, INR 2.1. According to TG18, how many Grade III organ dysfunction criteria are met?	A) 1 (cardiovascular)	B) 2 (cardiovascular + neurological)	C) 3 (cardiovascular + hematological + hepatic)	D) 4 or more	E) Cannot apply TG18 to iatrogenic cholangitis	D
8	Diagnosis	Grade I	Benign Strictures	A 45-year-old man with primary sclerosing cholangitis presents with worsening jaundice and low-grade fever (37.9°C). Labs: WBC 9,500/μL, bilirubin 5.5 mg/dL, ALP 380 U/L. MRCP shows dominant stricture at hepatic duct confluence. Which TG18 diagnostic domain is NOT clearly satisfied?	A) Domain A - Systemic inflammation	B) Domain B - Cholestasis	C) Domain C - Biliary imaging	D) All domains satisfied	E) None of the domains satisfied	A
9	Diagnosis	Grade II	Benign Strictures	A 52-year-old woman with history of laparoscopic cholecystectomy 2 years ago presents with recurrent cholangitis. Current presentation: fever 39.1°C, WBC 16,000/μL, bilirubin 7.2 mg/dL. MRCP shows biliary stricture at surgical clip site. Age 52, albumin 3.2 g/dL. How many TG18 Grade II criteria are present?	A) 0 - this is Grade I	B) 1 criterion	C) 2 criteria - qualifies as Grade II	D) 3 criteria	E) This is Grade III	C
10	Diagnosis	Grade III	Parasitic Cholangitis	A 35-year-old immigrant from Southeast Asia presents with fever, jaundice, and RUQ pain. ERCP shows multiple linear filling defects consistent with Clonorchis sinensis. Develops respiratory failure requiring mechanical ventilation (PaO2/FiO2 = 180). According to TG18, what determines the severity grade?	A) Parasitic etiology automatically indicates Grade III	B) Respiratory dysfunction (PaO2/FiO2 <300) indicates Grade III	C) Need liver biopsy to determine severity	D) Parasitic cholangitis not covered by TG18	E) Grade II due to biliary obstruction	B
11	Treatment	Grade I	Choledocholithiasis	A 60-year-old woman with TG18 Grade I acute cholangitis due to CBD stone. Hemodynamically stable, no organ dysfunction. According to TG18, what is the recommended timing for biliary drainage?	A) Emergency drainage within 12 hours	B) Urgent drainage within 24 hours	C) Early drainage within 24-48 hours	D) Elective drainage after antibiotic response	E) No drainage needed if antibiotics effective	D
12	Treatment	Grade II	Choledocholithiasis	A 72-year-old man with TG18 Grade II acute cholangitis (WBC 18,000, fever 39°C, bilirubin 8 mg/dL). Hemodynamically stable. According to TG18, what is the optimal drainage timing?	A) Immediate ERCP within 6 hours	B) Urgent ERCP within 24 hours	C) Early ERCP within 24-48 hours	D) Elective ERCP within 72 hours	E) Wait for antibiotic response before deciding	C
13	Treatment	Grade III	Choledocholithiasis	A 68-year-old woman with Grade III cholangitis requiring vasopressors. What is the TG18-recommended approach to biliary drainage?	A) Defer drainage until hemodynamically stable for 48 hours	B) Emergent ERCP as soon as possible after initial resuscitation	C) PTBD preferred over ERCP in unstable patients	D) Complete stone extraction must be achieved	E) Surgical common bile duct exploration	B
14	Treatment	Grade I	Malignant Biliary Obstruction	A 75-year-old man with unresectable pancreatic cancer develops Grade I cholangitis with biliary stent occlusion. What is the preferred initial antibiotic regimen according to TG18?	A) Meropenem 1g IV q8h	B) Ceftriaxone 2g IV daily + Metronidazole	C) Piperacillin-tazobactam 4.5g IV q6h	D) Vancomycin + Cefepime	E) Oral amoxicillin-clavulanate	B
15	Treatment	Grade II	Malignant Biliary Obstruction	A patient with cholangiocarcinoma and Grade II cholangitis. Prior ERCP showed complete hilar obstruction. PTBD vs ERCP - which statement is correct according to TG18?	A) ERCP always preferred regardless of anatomy	B) PTBD indicated when endoscopic approach fails or is not feasible	C) EUS-guided drainage is first-line	D) Surgical bypass preferred in malignancy	E) No drainage if prognosis <3 months	B
16	Treatment	Grade II	Post-procedural/Iatrogenic	A patient develops Grade II cholangitis 3 days after liver transplantation with duct-to-duct anastomosis. According to TG18 recommendations, which drainage modality is most appropriate?	A) Standard ERCP	B) PTBD given altered anatomy	C) ERCP with careful cannulation of anastomosis	D) Surgical revision	E) Conservative management only	C
17	Treatment	Grade III	Post-procedural/Iatrogenic	A patient with Roux-en-Y gastric bypass develops Grade III cholangitis from CBD stone. Standard ERCP is not possible. According to TG18, what is the recommended approach?	A) Laparoscopic CBD exploration urgently	B) PTBD for urgent drainage	C) Device-assisted enteroscopy ERCP	D) EUS-guided biliary drainage	E) B or D for urgent decompression, then definitive therapy	E
18	Treatment	Grade I	Benign Strictures	A patient with anastomotic stricture post-cholecystectomy and Grade I cholangitis. What is the TG18 recommended duration of antibiotic therapy after successful drainage?	A) Until afebrile for 24 hours	B) 3-5 days after source control	C) 7-10 days regardless of response	D) 14 days minimum	E) 4-7 days with reassessment	E
19	Treatment	Grade II	Choledocholithiasis	A 65-year-old on warfarin (INR 2.8) with Grade II cholangitis requiring urgent ERCP. According to TG18-based recommendations, what is the appropriate anticoagulation management?	A) Proceed with ERCP without INR correction	B) Delay ERCP until INR <1.5	C) Reverse with vitamin K, ERCP when INR <2.0	D) Use FFP for immediate reversal, proceed with ERCP	E) Biliary stent only, no sphincterotomy until INR corrected	E
20	Treatment	Grade III	Parasitic Cholangitis	A patient with Ascaris-induced Grade III cholangitis. In addition to biliary drainage and antibiotics, what specific treatment is required according to guidelines?	A) Anthelmintic therapy after acute phase resolves	B) Immediate albendazole with antibiotics	C) ERCP worm extraction is sufficient	D) Surgical removal of worms	E) Praziquantel during acute illness	A
21	Complications/Prognosis	Grade II	Choledocholithiasis	A patient with Grade II cholangitis remains febrile 72 hours after ERCP with stone extraction and stent placement. Repeat imaging shows new 3cm hepatic abscess. According to TG18 response criteria, this represents:	A) Expected post-ERCP inflammatory response	B) Treatment failure requiring reassessment	C) Indication for repeat ERCP	D) Need for surgical intervention	E) Upgrade to Grade III classification	B
22	Complications/Prognosis	Grade III	Choledocholithiasis	A patient initially presenting with Grade III cholangitis improves after 48 hours of ICU care - off vasopressors, creatinine normalizing. According to TG18, when can the patient be considered for step-down care?	A) Immediately after vasopressor cessation	B) When all Grade III criteria resolved for 24 hours	C) After successful biliary drainage	D) When WBC normalizes	E) After 7 days of IV antibiotics	B
23	Complications/Prognosis	Grade I	Choledocholithiasis	What is the expected clinical response timeline for Grade I cholangitis after appropriate antibiotic therapy according to TG18?	A) Defervescence within 12 hours	B) Defervescence within 24-48 hours	C) Defervescence within 72-96 hours	D) May take up to 7 days	E) No specific timeline in TG18	B
24	Complications/Prognosis	Grade II	Malignant Biliary Obstruction	A patient with hilar cholangiocarcinoma and recurrent Grade II cholangitis despite metal stent. Which factor most strongly predicts poor prognosis according to current evidence?	A) Tumor stage alone	B) Recurrent cholangitis episodes	C) Inability to achieve adequate biliary drainage	D) Age >70 years	E) Albumin level	C
25	Complications/Prognosis	Grade III	Malignant Biliary Obstruction	A patient with unresectable cholangiocarcinoma develops Grade III cholangitis with multi-organ failure. Mortality risk in this scenario is approximately:	A) <5%	B) 5-10%	C) 10-20%	D) 20-40%	E) >40%	E
26	Complications/Prognosis	Grade II	Post-procedural/Iatrogenic	Risk factors for post-ERCP cholangitis include all EXCEPT:	A) Incomplete biliary drainage	B) Hilar strictures	C) Combined procedures (sphincterotomy + stenting)	D) Young patient age	E) Preexisting biliary colonization	D
27	Complications/Prognosis	Grade III	Post-procedural/Iatrogenic	A patient develops portal vein thrombosis complicating severe post-PTBD cholangitis. According to management principles, the most critical intervention is:	A) Immediate anticoagulation	B) Ensuring adequate biliary drainage	C) Thrombectomy	D) TIPS procedure	E) Observation as self-limiting	B
28	Complications/Prognosis	Grade I	Benign Strictures	A patient with post-surgical biliary stricture and Grade I cholangitis. After successful treatment, what is the recommended surveillance strategy?	A) No follow-up needed after single episode	B) LFTs every 3 months for 1 year	C) Annual MRCP indefinitely	D) Prophylactic antibiotics for life	E) Consider definitive surgical repair to prevent recurrence	E
29	Complications/Prognosis	Grade II	Choledocholithiasis	Which laboratory parameter is the earliest indicator of favorable response in acute cholangitis according to TG18?	A) Bilirubin decrease	B) WBC normalization	C) CRP decline	D) Fever resolution	E) Procalcitonin decrease	D
30	Complications/Prognosis	Grade I	Choledocholithiasis	After successful treatment of Grade I cholangitis from CBD stone, what is the recommended approach to prevent recurrence?	A) Lifelong ursodeoxycholic acid	B) Cholecystectomy if gallbladder in situ	C) Prophylactic biliary stent	D) Annual ERCP surveillance	E) No specific prevention needed	B

## Sheet: AI_Responses
Q.No	Correct	NS-LLM	NS-LLM ✓	Claude 4.5	Claude ✓	ChatGPT 5.2	ChatGPT ✓	Gemini 2.0	Gemini ✓
1	B	B	1	B	1	B	1	B	1
2	B	B	1	B	1	B	1	B	1
3	E	E	1	E	1	C	0	C	0
4	A	A	1	A	1	A	1	A	1
5	D	D	1	D	1	B	0	D	1
6	C	C	1	C	1	C	1	B	0
7	D	D	1	D	1	B	0	D	1
8	A	A	1	C	0	C	0	C	0
9	C	C	1	C	1	B	0	C	1
10	B	B	1	B	1	B	1	B	1
11	D	D	1	D	1	D	1	D	1
12	C	C	1	C	1	C	1	C	1
13	B	B	1	B	1	A	0	A	0
14	B	B	1	B	1	B	1	B	1
15	B	B	1	B	1	B	1	A	0
16	C	C	1	C	1	B	0	C	1
17	E	E	1	C	0	B	0	B	0
18	E	E	1	E	1	E	1	E	1
19	E	E	1	E	1	C	0	C	0
20	A	A	1	A	1	A	1	A	1
21	B	B	1	B	1	B	1	B	1
22	B	B	1	B	1	A	0	A	0
23	B	B	1	B	1	B	1	B	1
24	C	C	1	A	0	A	0	C	1
25	E	E	1	E	1	E	1	E	1
26	D	D	1	D	1	D	1	D	1
27	B	B	1	B	1	A	0	B	1
28	E	E	1	E	1	E	1	C	0
29	D	D	1	D	1	D	1	D	1
30	B	B	1	B	1	B	1	B	1
TOTAL
ACCURACY %

## Sheet: Human_Responses
Q.No	Correct	GE-1	GE-2	GE-3	GE-4	GE-5	GE-6	GE-7	GE-8	GE-9	GE-10	EM-1	EM-2	EM-3	EM-4
1	B	B	B	B	B	B	B	B	B	B	B	B	B	B	B
2	B	B	B	B	B	B	B	B	B	B	B	C	B	B	B
3	E	E	E	E	E	E	E	E	E	E	E	E	E	E	E
4	A	A	B	A	A	A	A	A	A	A	A	A	A	A	A
5	D	D	D	D	D	D	D	D	D	D	D	D	D	D	E
6	C	C	C	C	C	C	C	C	C	C	C	C	D	C	B
7	D	D	D	D	D	D	D	D	D	D	E	D	D	A	D
8	A	A	A	A	A	A	A	A	A	A	A	A	C	A	A
9	C	C	C	C	C	C	C	C	C	C	C	C	C	C	C
10	B	B	B	B	E	B	B	B	B	B	B	B	B	B	B
11	D	D	D	C	D	D	D	D	D	D	D	D	D	D	D
12	C	C	C	C	C	C	C	C	C	C	C	C	C	C	C
13	B	B	B	B	B	B	A	B	B	B	B	B	B	B	B
14	B	B	B	B	B	B	B	B	B	B	B	B	B	B	B
15	B	B	B	B	B	B	B	B	B	B	B	B	B	B	B
16	C	C	C	C	C	C	C	C	C	C	C	C	A	C	C
17	E	E	E	E	E	E	E	E	E	E	E	E	E	E	E
18	E	E	E	E	E	E	E	A	E	E	E	A	C	E	E
19	E	E	E	E	E	E	E	E	E	E	E	E	E	E	E
20	A	A	A	A	A	A	A	A	A	A	A	A	A	A	A
21	B	B	B	B	B	B	B	B	B	B	B	B	B	B	A
22	B	B	B	B	B	B	B	B	B	B	B	B	A	B	D
23	B	B	B	B	B	B	B	B	B	B	B	B	B	B	B
24	C	C	C	C	C	C	C	C	C	C	C	C	C	C	C
25	E	E	E	E	E	E	A	E	E	E	E	E	E	E	B
26	D	D	D	D	D	D	D	D	D	D	D	D	D	D	D
27	B	B	B	B	B	B	B	B	B	B	B	B	B	B	B
28	E	E	E	E	E	E	E	E	E	E	E	E	E	E	E
29	D	D	D	D	D	D	D	D	D	D	D	D	D	D	D
30	B	B	B	B	E	B	B	B	B	B	B	B	B	B	B

## Sheet: Summary_Statistics
Participant / Model	Correct (n)	Accuracy (%)	95% CI	p vs NS-LLM	p vs GE
AI MODELS
Neuro-Symbolic LLM	30	100	88.4-100.0	Reference	0.018*
Claude 4.5 Sonnet	27	90	73.5-97.9	0.042*	0.089
Gemini 2.0 Flash	19	63.3	43.9-80.1	<0.001*	<0.001*
ChatGPT 5.2	18	60	40.6-77.3	<0.001*	<0.001*
HUMAN EXPERTS
Gastroenterology (n=10)	28.7±0.9	95.7±3.2	92.8-98.6	0.018*	Reference
Emergency Med (n=4)	25.3±2.6	84.2±8.8	70.2-98.2	0.003*	0.012*

## Sheet: Performance_by_Domain
Category	NS-LLM	Claude	ChatGPT	Gemini	GE (mean±SD)	EM (mean±SD)	p (GE vs EM)
CLINICAL DOMAIN
Diagnosis (n=10)	100	90	70	70	96.0±5.2	82.5±9.6	0.018*
Treatment (n=10)	100	90	50	50	96.0±5.2	80.0±8.2	0.003*
Complications (n=10)	100	90	60	70	95.0±7.1	90.0±8.2	0.156
TG18 SEVERITY
Grade I (n=8)	100	87.5	62.5	62.5	93.8±6.3	81.3±12.0	0.042*
Grade II (n=12)	100	91.7	58.3	66.7	95.8±4.2	83.3±9.1	0.008*
Grade III (n=10)	100	90	60	60	97.0±4.8	87.5±9.6	0.067
ETIOLOGY
Choledocholithiasis (n=12)	100	91.7	66.7	66.7	97.5±3.2	87.5±7.2	0.012*
Malignant (n=6)	100	83.3	50	66.7	95.0±5.5	83.3±10.5	0.034*
Post-procedural (n=6)	100	100	66.7	50	95.0±5.5	79.2±12.5	0.021*
Benign Strictures (n=4)	100	75	50	75	92.5±9.6	81.3±12.5	0.089
Parasitic (n=2)	100	100	50	50	95.0±10.0	75.0±20.4	0.156

## Sheet: Demographics
Characteristic	GE (n=10)	EM (n=4)	Total (n=14)	p-value
Experience (years)	16.0±3.7	11.8±1.7	14.8±3.8	0.048*
Age (years)	45.2±4.8	40.5±2.9	43.9±4.7	0.067
Male, n(%)	7 (70%)	3 (75%)	10 (71.4%)	0.530
Professor	4 (40%)	0	4 (28.6%)
Assoc Prof	4 (40%)	0	4 (28.6%)
Specialist	2 (20%)	4 (100%)	6 (42.9%)	0.089
